# Supplementary material for: In vivo differentiation of induced pluripotent stem cells into neural stem cells by chimera formation
Source: PubMed Central journal article supplement (PMC5283667; doi:10.1371/journal.pone.0170735), 2017-01-31
Supplement: pone.0170735.s006.pdf [file pone.0170735.s006.pdf]

| Annotation Cluster 1       |       |          | Enrichment Score: 5.43 |
|----------------------------|-------|----------|------------------------|
| GO term                    | Count | P_Value  |                        |
| blood vessel development   | 15    | 2.30E-06 |                        |
| vasculature development    | 15    | 3.10E-06 |                        |
| blood vessel morphogenesis | 13    | 7.20E-06 |                        |

| Annotation Cluster 2            |       |          | Enrichment Score: 2.47 |
|---------------------------------|-------|----------|------------------------|
| GO term                         | Count | P_Value  |                        |
| actin cytoskeleton organization | 9     | 1.10E-03 |                        |
| actin filament-based process    | 9     | 1.70E-03 |                        |
| cytoskeleton organization       | 10    | 2.20E-02 |                        |

| Annotation Cluster 3          |       |          | Enrichment Score: 1.93 |
|-------------------------------|-------|----------|------------------------|
| GO term                       | Count | P_Value  |                        |
| embryonic organ morphogenesis | 8     | 4.10E-03 |                        |
| embryonic organ development   | 9     | 1.10E-02 |                        |
| embryonic morphogenesis       | 10    | 3.70E-02 |                        |

| Annotation Cluster 4                       |       |          | Enrichment Score: 1.9 |
|--------------------------------------------|-------|----------|-----------------------|
| GO term                                    | Count | P_Value  |                       |
| regulation of phosphorylation              | 10    | 1.10E-02 |                       |
| regulation of phosphorus metabolic process | 10    | 1.40E-02 |                       |
| regulation of phosphate metabolic process  | 10    | 1.40E-02 |                       |

| Annotation Cluster 5             |       |          | Enrichment Score: 1.81 |
|----------------------------------|-------|----------|------------------------|
| GO term                          | Count | P_Value  |                        |
| cholesterol biosynthetic process | 4     | 2.80E-03 |                        |
| sterol biosynthetic process      | 4     | 6.10E-03 |                        |
| steroid biosynthetic process     | 5     | 1.20E-02 |                        |
| cholesterol metabolic process    | 4     | 5.70E-02 |                        |
| sterol metabolic process         | 4     | 7.20E-02 |                        |

| Annotation Cluster 6  |       |          | Enrichment Score: 1.77 |
|-----------------------|-------|----------|------------------------|
| GO term               | Count | P_Value  |                        |
| membrane invagination | 8     | 9.50E-03 |                        |
| endocytosis           | 8     | 9.50E-03 |                        |
| membrane organization | 8     | 5.50E-02 |                        |

| Annotation Cluster 7                  |       |          | Enrichment Score: 1.47 |
|---------------------------------------|-------|----------|------------------------|
| GO term                               | Count | P_Value  |                        |
| regulation of protein kinase activity | 7     | 3.00E-02 |                        |
| regulation of kinase activity         | 7     | 3.40E-02 |                        |
| regulation of transferase activity    | 7     | 3.90E-02 |                        |

| Annotation Cluster 1     |       |          | Enrichment Score: 1.26 |
|--------------------------|-------|----------|------------------------|
| KEGG pathway             | Count | P_Value  |                        |
| Small cell lung cancer   | 5     | 2.10E-02 |                        |
| ECM-receptor interaction | 4     | 8.30E-02 |                        |
| Focal adhesion           | 6     | 9.70E-02 |                        |

| Annotation Cluster 2                            |       |          | Enrichment Score: 0.97 |
|-------------------------------------------------|-------|----------|------------------------|
| KEGG pathway                                    | Count | P_Value  |                        |
| Arrhythmogenic right ventricular cardiomyopathy | 5     | 1.40E-02 |                        |
| Hypertrophic cardiomyopathy (HCM)               | 3     | 2.80E-01 |                        |
| Dilated cardiomyopathy                          | 3     | 3.20E-01 |                        |

| Annotation Cluster 1         |       |          | Enrichment Score: 3.07 |
|------------------------------|-------|----------|------------------------|
| GO term                      | Count | P_Value  |                        |
| acetyl-CoA metabolic process | 7     | 8.40E-06 |                        |
| coenzyme metabolic process   | 8     | 8.30E-03 |                        |
| cofactor metabolic process   | 9     | 9.10E-03 |                        |

| Annotation Cluster 2                                |       |          | Enrichment Score: 2.78 |
|-----------------------------------------------------|-------|----------|------------------------|
| GO term                                             | Count | P_Value  |                        |
| cofactor catabolic process                          | 6     | 1.40E-04 |                        |
| tricarboxylic acid cycle                            | 5     | 4.50E-04 |                        |
| acetyl-CoA catabolic process                        | 5     | 5.30E-04 |                        |
| aerobic respiration                                 | 5     | 8.50E-04 |                        |
| coenzyme catabolic process                          | 5     | 1.10E-03 |                        |
| cellular respiration                                | 5     | 1.50E-02 |                        |
| energy derivation by oxidation of organic compounds | 5     | 7.30E-02 |                        |

| Annotation Cluster 3                                                     |       |          | Enrichment Score: 2.28 |
|--------------------------------------------------------------------------|-------|----------|------------------------|
| GO term                                                                  | Count | P_Value  |                        |
| nucleotide biosynthetic process                                          | 10    | 2.00E-03 |                        |
| ATP biosynthetic process                                                 | 7     | 2.00E-03 |                        |
| nucleobase, nucleoside, nucleotide and nucleic acid biosynthetic process | 10    | 2.40E-03 |                        |
| nucleobase, nucleoside and nucleotide biosynthetic process               | 10    | 2.40E-03 |                        |
| purine ribonucleotide metabolic process                                  | 8     | 3.10E-03 |                        |
| ATP metabolic process                                                    | 7     | 3.20E-03 |                        |
| purine ribonucleoside triphosphate biosynthetic process                  | 7     | 3.80E-03 |                        |
| ribonucleoside triphosphate biosynthetic process                         | 7     | 3.80E-03 |                        |
| ribonucleotide metabolic process                                         | 8     | 4.00E-03 |                        |
| purine nucleoside triphosphate biosynthetic process                      | 7     | 4.00E-03 |                        |
| nucleoside triphosphate biosynthetic process                             | 7     | 4.20E-03 |                        |
| purine ribonucleoside triphosphate metabolic process                     | 7     | 5.70E-03 |                        |
| ribonucleoside triphosphate metabolic process                            | 7     | 6.00E-03 |                        |
| purine nucleotide biosynthetic process                                   | 8     | 6.60E-03 |                        |
| purine nucleoside triphosphate metabolic process                         | 7     | 7.20E-03 |                        |
| purine ribonucleotide biosynthetic process                               | 7     | 7.50E-03 |                        |
| ribonucleotide biosynthetic process                                      | 7     | 8.90E-03 |                        |
| nucleoside triphosphate metabolic process                                | 7     | 1.10E-02 |                        |
| purine nucleotide metabolic process                                      | 8     | 1.50E-02 |                        |
| nitrogen compound biosynthetic process                                   | 10    | 5.50E-02 |                        |

| Annotation Cluster 4                        |       |          | Enrichment Score: 1.93 |
|---------------------------------------------|-------|----------|------------------------|
| GO term                                     | Count | P_Value  |                        |
| regulation of transmission of nerve impulse | 7     | 7.50E-03 |                        |
| regulation of neurological system process   | 7     | 9.70E-03 |                        |
| regulation of synaptic transmission         | 6     | 2.20E-02 |                        |

| Annotation Cluster 5          |       |          | Enrichment Score: 1.87 |
|-------------------------------|-------|----------|------------------------|
| GO term                       | Count | P_Value  |                        |
| ion homeostasis               | 12    | 7.80E-03 |                        |
| cellular homeostasis          | 13    | 9.40E-03 |                        |
| cellular ion homeostasis      | 11    | 9.60E-03 |                        |
| cellular chemical homeostasis | 11    | 1.10E-02 |                        |
| chemical homeostasis          | 13    | 1.50E-02 |                        |
| homeostatic process           | 16    | 4.90E-02 |                        |

| Annotation Cluster 6                     |       |          | Enrichment Score: 1.67 |
|------------------------------------------|-------|----------|------------------------|
| GO term                                  | Count | P_Value  |                        |
| regulation of nervous system development | 8     | 9.90E-03 |                        |
| regulation of neurogenesis               | 7     | 2.00E-02 |                        |
| regulation of neuron differentiation     | 6     | 2.40E-02 |                        |
| regulation of cell development           | 7     | 4.30E-02 |                        |

| Annotation Cluster 1      |       |          | Enrichment Score: 0.9 |
|---------------------------|-------|----------|-----------------------|
| KEGG pathway              | Count | P_Value  |                       |
| Oxidative phosphorylation | 7     | 4.40E-02 |                       |
| Alzheimer's disease       | 8     | 6.90E-02 |                       |
| Parkinson's disease       | 5     | 2.70E-01 |                       |
| Huntington's disease      | 6     | 3.00E-01 |                       |
