# Supplementary material for: In vivo differentiation of induced pluripotent stem cells into neural stem cells by chimera formation
Source: PubMed Central journal article supplement (PMC5283667; doi:10.1371/journal.pone.0170735), 2017-01-31
Supplement: pone.0170735.s007.pdf [file pone.0170735.s007.pdf]

| <b>Annotation Cluster 1</b> |              | Enrichment Score: 1.89 |  |
|-----------------------------|--------------|------------------------|--|
| <b>GO term</b>              | <b>Count</b> | <b>P_Value</b>         |  |
| cell-cell adhesion          | 7            | 3.60E-03               |  |
| cell adhesion               | 9            | 2.40E-02               |  |
| biological adhesion         | 9            | 2.40E-02               |  |

| <b>Annotation Cluster 2</b>              |              | Enrichment Score: 1.81 |  |
|------------------------------------------|--------------|------------------------|--|
| <b>GO term</b>                           | <b>Count</b> | <b>P_Value</b>         |  |
| regulation of neurogenesis               | 5            | 9.40E-03               |  |
| regulation of nervous system development | 5            | 1.40E-02               |  |
| regulation of cell development           | 5            | 1.80E-02               |  |
| regulation of neuron differentiation     | 4            | 2.60E-02               |  |

| <b>Annotation Cluster 1</b> |              | Enrichment Score: 4.11 |  |
|-----------------------------|--------------|------------------------|--|
| <b>GO term</b>              | <b>Count</b> | <b>P_Value</b>         |  |
| tube morphogenesis          | 10           | 3.80E-05               |  |
| tube development            | 12           | 4.60E-05               |  |
| epithelium development      | 11           | 2.70E-04               |  |

| <b>Annotation Cluster 2</b>    |              | Enrichment Score: 3.63 |  |
|--------------------------------|--------------|------------------------|--|
| <b>GO term</b>                 | <b>Count</b> | <b>P_Value</b>         |  |
| epithelial tube morphogenesis  | 8            | 9.30E-05               |  |
| morphogenesis of an epithelium | 9            | 2.60E-04               |  |
| epithelium development         | 11           | 2.70E-04               |  |
| tissue morphogenesis           | 10           | 4.70E-04               |  |

| <b>Annotation Cluster 3</b>                           |              | Enrichment Score: 3.33 |  |
|-------------------------------------------------------|--------------|------------------------|--|
| <b>GO term</b>                                        | <b>Count</b> | <b>P_Value</b>         |  |
| chordate embryonic development                        | 14           | 2.00E-04               |  |
| embryonic development ending in birth or egg hatching | 14           | 2.20E-04               |  |
| embryonic morphogenesis                               | 11           | 2.40E-03               |  |

| <b>Annotation Cluster 4</b>           |              | Enrichment Score: 2.51 |  |
|---------------------------------------|--------------|------------------------|--|
| <b>GO term</b>                        | <b>Count</b> | <b>P_Value</b>         |  |
| primary neural tube formation         | 5            | 6.80E-04               |  |
| neural tube formation                 | 5            | 1.40E-03               |  |
| embryonic epithelial tube formation   | 5            | 1.70E-03               |  |
| tube lumen formation                  | 5            | 2.40E-03               |  |
| neural tube closure                   | 4            | 6.10E-03               |  |
| tube closure                          | 4            | 6.10E-03               |  |
| morphogenesis of embryonic epithelium | 5            | 6.60E-03               |  |
| neural tube development               | 5            | 8.20E-03               |  |

| <b>Annotation Cluster 5</b>             |              | Enrichment Score: 1.96 |  |
|-----------------------------------------|--------------|------------------------|--|
| <b>GO term</b>                          | <b>Count</b> | <b>P_Value</b>         |  |
| embryonic skeletal system morphogenesis | 5            | 3.30E-03               |  |
| skeletal system morphogenesis           | 6            | 8.20E-03               |  |
| embryonic skeletal system development   | 5            | 8.20E-03               |  |
| embryonic organ morphogenesis           | 5            | 6.90E-02               |  |

| <b>Annotation Cluster 6</b>                    |              | Enrichment Score: 1.84 |  |
|------------------------------------------------|--------------|------------------------|--|
| <b>GO term</b>                                 | <b>Count</b> | <b>P_Value</b>         |  |
| cell morphogenesis                             | 9            | 9.70E-03               |  |
| cell morphogenesis involved in differentiation | 7            | 1.60E-02               |  |
| cellular component morphogenesis               | 9            | 2.00E-02               |  |

| <b>Annotation Cluster 7</b>                                              |              | Enrichment Score: 1.52 |  |
|--------------------------------------------------------------------------|--------------|------------------------|--|
| <b>GO term</b>                                                           | <b>Count</b> | <b>P_Value</b>         |  |
| pyrimidine nucleotide biosynthetic process                               | 4            | 8.70E-04               |  |
| pyrimidine nucleotide metabolic process                                  | 4            | 2.10E-03               |  |
| nucleotide biosynthetic process                                          | 5            | 8.60E-02               |  |
| nucleobase, nucleoside and nucleotide biosynthetic process               | 5            | 9.30E-02               |  |
| nucleobase, nucleoside, nucleotide and nucleic acid biosynthetic process | 5            | 9.30E-02               |  |
| nucleoside metabolic process                                             | 3            | 1.00E-01               |  |
| nitrogen compound biosynthetic process                                   | 6            | 1.60E-01               |  |
